# Supplementary material for: Polyanhydride nanoparticles by ‘click’ thiol–ene polymerization
Source: Royal Society of Chemistry journal article supplement (doi:10.1039/c5py00843c), 2015-01-01
Supplement: c5py00843c1.pdf [file c5py00843c1.pdf]

## SUPPORTING INFORMATION

### Polyanhydride Nanoparticles by ‘Click’ Thiol-Ene Polymerization

Katie L. Poetz,<sup>a</sup> Olivia Z Durham<sup>a</sup> and Devon A. Shipp<sup>\*a,b</sup>

<sup>a</sup> Department of Chemistry & Biomolecular Science, Clarkson University, Potsdam NY 13699-5810, U.S.A. Email: [dshipp@clarkson.edu](mailto:dshipp@clarkson.edu). Tel. +1-315-268-2393.

<sup>b</sup> Center for Advanced Materials Processing, Clarkson University, Potsdam NY 13699-5810, U.S.A.

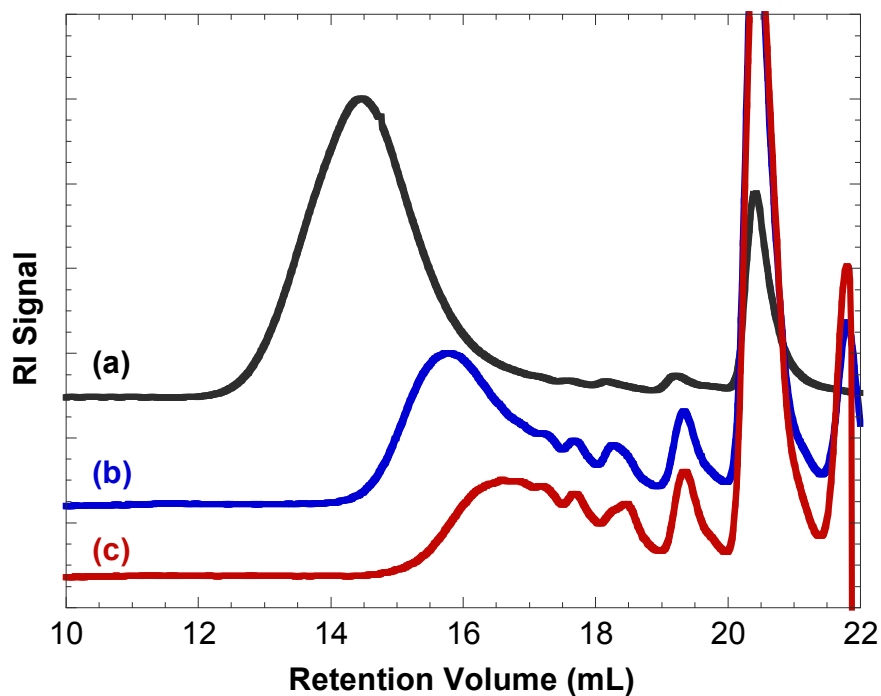

**Figure SI-1.** GPC traces of PA and PA degradation (in 3:1 THF:water) degradation of PA. (a)  $t = 0$  ( $M_n = 12,600$ ,  $D = 2.23$ ), (b)  $t = 30$  min. ( $M_n = 2,200$ ,  $D = 2.42$ ), (c)  $t = 60$  min. ( $M_n = 1,300$ ,  $D = 2.03$ ).

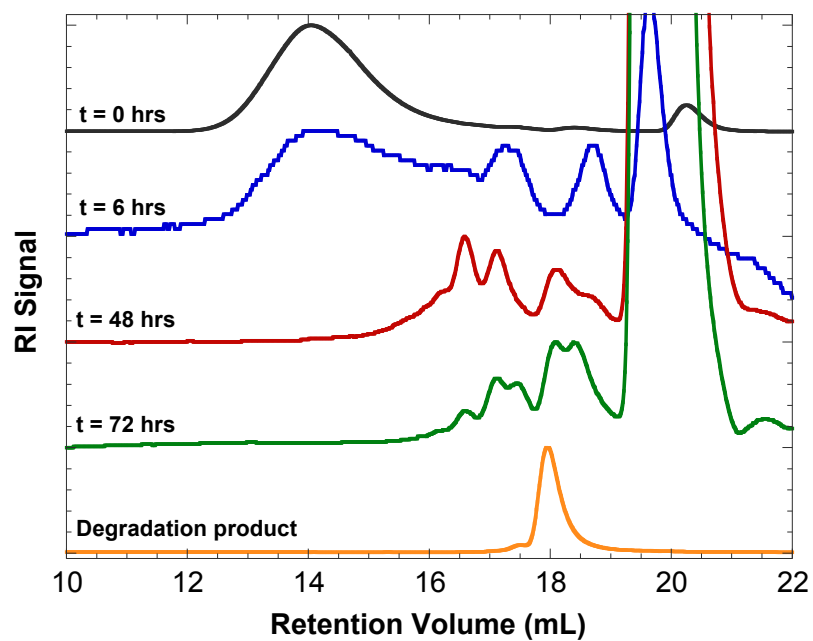

**Figure SI-2.** GPC traces of PA prepolymer ( $t=0$  hrs,  $M_n = 8,400$ ,  $\mathcal{D} = 2.48$ ) and PA particles as a function of degradation time at  $37^\circ\text{C}$  in PBS solution. Also shown is the GPC trace of the model degradation product (Scheme 1 (**1**)).

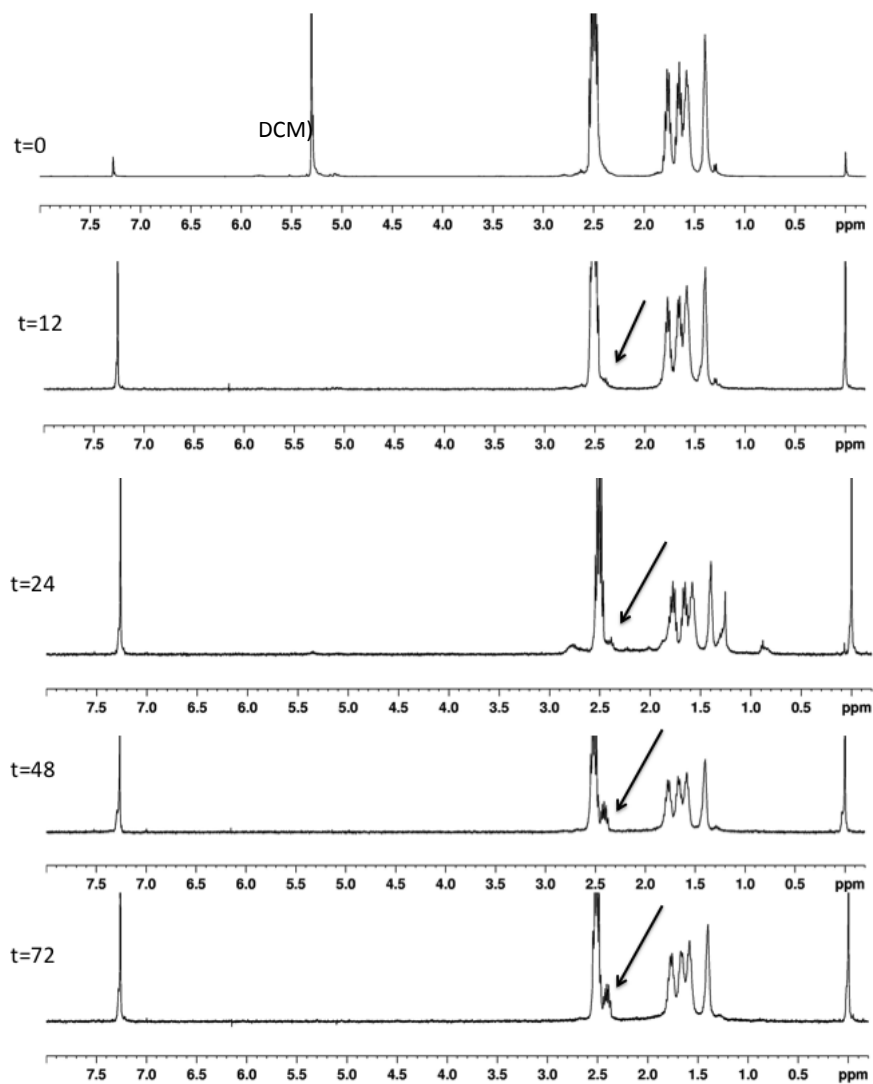

**Figure SI-3.** <sup>1</sup>H NMR spectra (CDCl<sub>3</sub>) of PA particles as a function of degradation time in PBS solution at 37°C. Peak at ~2.4 ppm due the proton α to the carboxylic acid is indicated by the arrow.

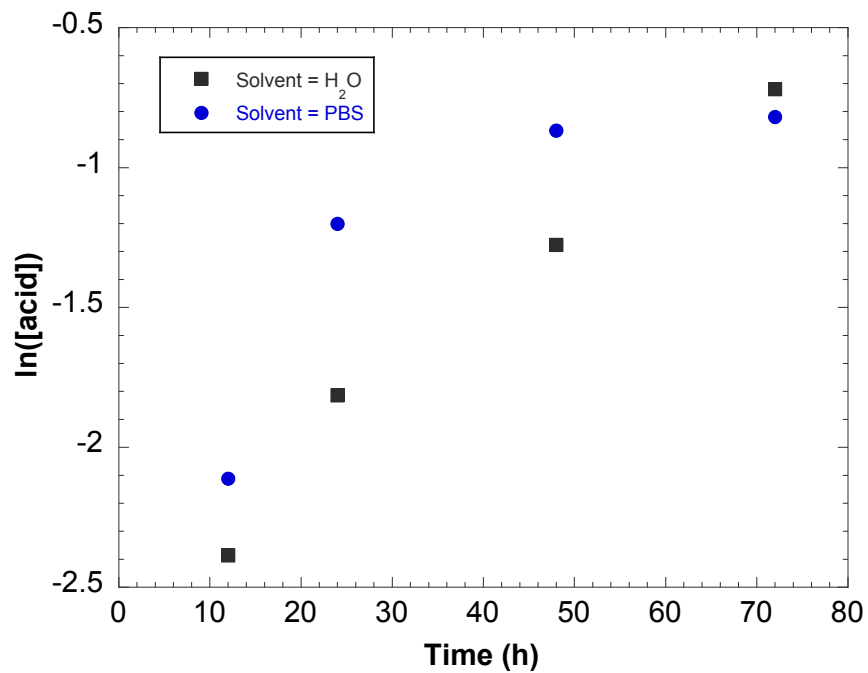

**Figure SI-4.** First-order plots of the integrations of peaks at  $\sim 2.4$  ppm (due to proton  $\alpha$  to the carboxylic acid) from  $^1H$  NMR spectra ( $CDCl_3$ ) of PA particles as a function of degradation time in water at  $37^\circ C$ .

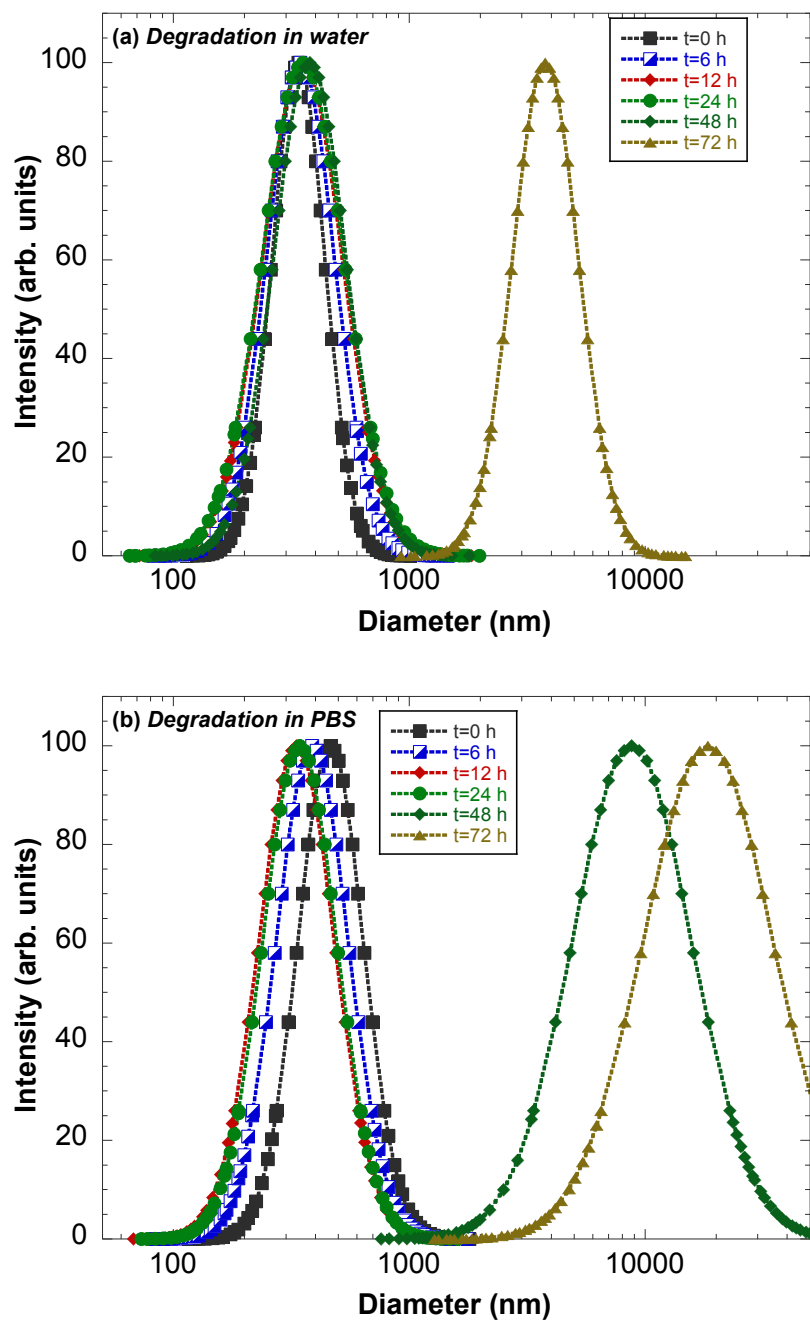

**Figure SI-5.** DLS curves of PA nanoparticles ( $M_n = 8,400$ ,  $d = 2.48$ ) and PA nanoparticles as a function of degradation time at 37°C in (a) water and (b) PBS solution.
